# Supplementary material for: Real-World Persistence with Ocrelizumab in Multiple Sclerosis: a Systematic Review
Source: PubMed Central journal article supplement — Neurol Ther. 2024 Oct 19;13(6):1597–605. doi: 10.1007/s40120-024-00667-w (PMC11541982; doi:10.1007/s40120-024-00667-w), 2024-10-19
Supplement: 40120_2024_667_MOESM1_ESM.pdf [file 40120_2024_667_MOESM1_ESM.pdf]

## SUPPLEMENTARY MATERIAL

Real-world persistence with ocrelizumab in multiple sclerosis: a systematic review

**Authors:** John L Petrie<sup>1</sup>, Charlie A Smith<sup>2</sup>, Donna Fountain<sup>1</sup>, Gerardo Machnicki<sup>2</sup>

**Author affiliations:** <sup>1</sup>Putnam, Portland House, New Bridge Street West, Newcastle upon Tyne, NE1 8AP, UK; <sup>2</sup>F. Hoffmann-La Roche Ltd, Grenzacherstrasse, Basel, Switzerland

**Correspondence details:** Charlie A Smith: F. Hoffmann-La Roche Ltd, Grenzacherstrasse, Basel, Switzerland; [charlie.smith@roche.com](mailto:charlie.smith@roche.com)

## Appendix A. Search terms used

### Medline

Searched 07/10/22 via OvidSP interface.

Database: Ovid MEDLINE(R) and Epub Ahead of Print, In-Process, In-Data-Review & Other Non-

Indexed Citations and Daily <1946 to October 06, 2022>

Search Strategy:

- 1 Multiple Sclerosis, Relapsing-Remitting/ (7781)
- 2 Multiple Sclerosis, Chronic Progressive/ (2512)
- 3 (((("chariot disease" or ((disseminated or insular or multiple\$) adj1 sclerosis) or "encephalomyelitis disseminata" or MS) adj2 (relaps\$ or remission\$ or remitting or progression\$ or progressive)) or RRMS or PPMS).ti,ab. (16679)
- 4 or/1-3 (19061)
- 5 exp "Treatment Adherence and Compliance"/ (271360)
- 6 (abstain\$ or abstinence\$ or adher\$ or nonadher\$ or cessati\$ or comply\$ or compliance or noncompliance or continu\$ or discontinu\$ or persist\$ or withdraw\$ or withhold\$).ti,ab. (2320881)
- 7 5 or 6 (2509450)
- 8 (ocrelizumab or Ocrevus\$ or PR070769 or PRO-70769 or PRO70769 or "rhuMAb 2H7" or RO4964913).af. (767)
- 9 Epidemiologic studies/ (9177)
- 10 exp case control studies/ (1358762)
- 11 exp cohort studies/ (2401679)
- 12 Case control.tw. (146929)
- 13 (cohort adj (study or studies)).tw. (287049)
- 14 Cohort analy\$.tw. (10812)
- 15 (Follow up adj (study or studies)).tw. (54510)
- 16 (observational adj (study or studies)).tw. (146913)
- 17 Longitudinal.tw. (302066)
- 18 Retrospective.tw. (689382)
- 19 Cross sectional.tw. (470577)
- 20 Cross-sectional studies/ (442017)
- 21 or/9-20 (3615694)
- 22 4 and 7 and 8 and 21 (30)

### Embase

Searched 07/10/22 via OvidSP interface.

Database: Embase <1974 to 2022 Week 39>

Search Strategy:

- 1 multiple sclerosis/ (148306)
- 2 (((("chariot disease" or ((disseminated or insular or multiple\$) adj1 sclerosis) or "encephalomyelitis disseminata" or MS) adj2 (relaps\$ or remission\$ or remitting or progression\$ or progressive)) or RRMS or PPMS).ti,ab. (34884)
- 3 1 or 2 (151192)

- 4 exp patient compliance/ (180262)
- 5 exp treatment withdrawal/ (255325)
- 6 (abstain\$ or abstinence\$ or adher\$ or nonadher\$ or cessati\$ or comply\$ or compliance or noncompliance or continu\$ or discontinu\$ or persist\$ or withdraw\$ or withhold\$).ti,ab. (3184794)
- 7 or/4-6 (3382776)
- 8 ocrelizumab/ (3311)
- 9 (ocrelizumab or Ocrevus\$ or PR070769 or PRO-70769 or PRO70769 or "rhuMAb 2H7" or RO4964913).af. (3444)
- 10 8 or 9 (3444)
- 11 Clinical study/ (160539)
- 12 Case control study/ (193371)
- 13 Family study/ (25694)
- 14 Longitudinal study/ (178980)
- 15 Retrospective study/ (1314578)
- 16 Prospective study/ (798085)
- 17 Randomized controlled trials/ (235539)
- 18 16 not 17 (788668)
- 19 Cohort analysis/ (901142)
- 20 (Cohort adj (study or studies)).mp. (422529)
- 21 (Case control adj (study or studies)).ti,ab. (158099)
- 22 (follow up adj (study or studies)).ti,ab. (70450)
- 23 (observational adj (study or studies)).ti,ab. (227238)
- 24 (epidemiologic\$ adj (study or studies)).ti,ab. (117592)
- 25 (cross sectional adj (study or studies)).ti,ab. (303153)
- 26 or/11-15,18-25 (3569355)
- 27 3 and 7 and 10 and 26 (221)

## Appendix B. PICOS criteria

| Element       | Inclusion Criteria                                                                                                                                                                                                                                                                                | Exclusion criteria                                                                                                                                                        |
|---------------|---------------------------------------------------------------------------------------------------------------------------------------------------------------------------------------------------------------------------------------------------------------------------------------------------|---------------------------------------------------------------------------------------------------------------------------------------------------------------------------|
| Population    | <ul style="list-style-type: none"> <li>Patients with relapsing remitting multiple sclerosis (RRMS) or primary progressive multiple sclerosis (PPMS)</li> </ul>                                                                                                                                    | <ul style="list-style-type: none"> <li>Studies not specifically reporting on the population specified in the inclusion criteria</li> </ul>                                |
| Intervention  | <ul style="list-style-type: none"> <li>Ocrelizumab</li> </ul>                                                                                                                                                                                                                                     | <ul style="list-style-type: none"> <li>NA</li> </ul>                                                                                                                      |
| Comparator(s) | <ul style="list-style-type: none"> <li>Any/none</li> </ul>                                                                                                                                                                                                                                        | <ul style="list-style-type: none"> <li>NA</li> </ul>                                                                                                                      |
| Outcome(s)    | <ul style="list-style-type: none"> <li>Any relating to discontinuation, persistence, adherence, or compliance</li> </ul>                                                                                                                                                                          | <ul style="list-style-type: none"> <li>Outcomes not listed in this section</li> </ul>                                                                                     |
| Study type(s) | <ul style="list-style-type: none"> <li>Observational/real-world evidence studies (prospective/retrospective cohort, cross sectional, case control, case series) of sufficient sample size (e.g., <math>\geq 10</math> patients)</li> <li>Any country</li> <li>English language studies</li> </ul> | <ul style="list-style-type: none"> <li>Studies not reporting real-world evidence (e.g., RCTs, cost-effectiveness models)</li> <li>Non-English language studies</li> </ul> |

**Table S1. Overview of study characteristics**

| Author (year of publication)                                       | Full text/abstract | Country              | Total sample size | Type of MS | Sample size by type of MS | Line of ocrelizumab treatment |        | Exposure time      |
|--------------------------------------------------------------------|--------------------|----------------------|-------------------|------------|---------------------------|-------------------------------|--------|--------------------|
|                                                                    |                    |                      |                   |            |                           | First line                    | Switch |                    |
| <b>Relapsing remitting MS (RRMS)</b>                               |                    |                      |                   |            |                           |                               |        |                    |
| Bewick (2020)                                                      | Abstract           | England              | 28                | RRMS       | 28                        | ✓                             | ✓      | NR                 |
| Bossart (2022)                                                     | Full text          | Switzerland          | 668               | RRMS       | 668                       | NR                            | NR     | 6 months           |
| Evertsson (2020)                                                   | Full text          | Sweden, USA          | 472               | RRMS       | 472                       | ✓                             | ✓      | NR                 |
| Frahm (2022)                                                       | Full text          | Germany              | 2536              | RRMS       | 2536                      | ×                             | ✓      | NR                 |
| Garcia-Canibano (2021)                                             | Full text          | Qatar                | 57                | RRMS       | 57                        | ✓                             | ✓      | 19 months (median) |
| Smoot (2019)                                                       | Abstract           | USA                  | 21                | RRMS       | 21                        | ×                             | ✓      | NR                 |
| Zanghi (2021)                                                      | Full text          | Italy                | 120               | RRMS       | 120                       | ×                             | ✓      | 6-18 months        |
| Zivadinov (2022)                                                   | Full text          | USA                  | 27                | RRMS       | 27                        | ×                             | ✓      | 24 months          |
| <b>Primary progressive MS (PPMS)</b>                               |                    |                      |                   |            |                           |                               |        |                    |
| Braune (2021)                                                      | Abstract           | Germany              | 460               | PPMS       | 460                       | NR                            | NR     | 1.5 years (mean)   |
| Lopez Ruiz (2020)                                                  | Abstract           | Spain                | 18                | PPMS       | 18                        | ✓                             | ✓      | 13.8 months (mean) |
| <b>Relapsing remitting and primary progressive MS (stratified)</b> |                    |                      |                   |            |                           |                               |        |                    |
| Braune (2020)                                                      | Abstract           | Germany              | 439               | RRMS       | 352                       | ✓                             | ✓      | ≥3 months          |
|                                                                    |                    |                      |                   | PPMS       | 52                        | ✓                             | ✓      |                    |
|                                                                    |                    |                      |                   | SPMS       | 35                        | ✓                             | ✓      |                    |
| Butzkueven (2019)                                                  | Abstract           | Europe and Australia | 1216              | RRMS       | 882                       | ✓                             | ✓      | ≥6 months          |
|                                                                    |                    |                      |                   | PPMS       | 174                       | ✓                             | ✓      |                    |
|                                                                    |                    |                      |                   | SPMS       | 160                       | ✓                             | ✓      |                    |
| Cellerino (2021)                                                   | Full text          | Italy                | 153               | RRMS       | 93                        | ✓                             | ✓      | NR                 |
|                                                                    |                    |                      |                   | PPMS/SPMS  | 60                        | ✓                             | ✓      |                    |
| Ellwardt (2020)                                                    | Full text          | Germany              | 210               | PPMS       | 55                        | ✓                             | ✓      | NR                 |

| Author (year of publication)                                           | Full text/abstract | Country                            | Total sample size | Type of MS | Sample size by type of MS | Line of ocrelizumab treatment |        | Exposure time      |
|------------------------------------------------------------------------|--------------------|------------------------------------|-------------------|------------|---------------------------|-------------------------------|--------|--------------------|
|                                                                        |                    |                                    |                   |            |                           | First line                    | Switch |                    |
|                                                                        |                    |                                    |                   | RRMS/SPMS  | 155                       | ✓                             | ✓      |                    |
| Ozakbas (2021)                                                         | Abstract           | NR                                 | 304               | RRMS       | 87                        | NR                            | NR     | 6 months           |
|                                                                        |                    |                                    |                   | PPMS       | 42                        | NR                            | NR     |                    |
| Rojas (2021)                                                           | Full text          | Argentina, Chile, Mexico           | 81                | RRMS       | 52                        | ✓                             | ✓      | NR                 |
|                                                                        |                    |                                    |                   | PPMS       | 29                        | ✓                             | ✓      |                    |
| Weber (2022)                                                           | Full text          | Germany                            | 2100              | RRMS       | 1702                      | ✓                             | ✓      | 1.03 years (mean)  |
|                                                                        |                    |                                    |                   | PPMS       | 398                       | ✓                             | ✓      | 1.06 years (mean)  |
| <b>Relapsing remitting and primary progressive MS (not stratified)</b> |                    |                                    |                   |            |                           |                               |        |                    |
| Baghestani (2020)                                                      | Abstract           | UAE                                | 27                | RRMS       | 22                        | ✓                             | ✓      | NR                 |
|                                                                        |                    |                                    |                   | PPMS       | 5                         | ✓                             | ✓      |                    |
| Butzkueven (2021)                                                      | Abstract           | Australia, Turkey, Kuwait, Belgium | 800               | RRMS       | NR                        | ✓                             | ✓      | 1.8 years (median) |
|                                                                        |                    |                                    |                   | PPMS       | NR                        | ✓                             | ✓      |                    |
|                                                                        |                    |                                    |                   | SPMS       | NR                        | ✓                             | ✓      |                    |
| Coban (2021)                                                           | Full text          | USA                                | 82                | RRMS       | 59                        | ✓                             | ✓      | NR                 |
|                                                                        |                    |                                    |                   | PPMS       | 14                        | ✓                             | ✓      |                    |
|                                                                        |                    |                                    |                   | SPMS       | 9                         | ✓                             | ✓      |                    |
| Fernandez-Diaz (2021)                                                  | Full text          | Spain                              | 228               | RRMS       | 144                       | ✓                             | ✓      | 12 months          |
|                                                                        |                    |                                    |                   | PPMS       | 59                        | ✓                             | ✓      |                    |
|                                                                        |                    |                                    |                   | SPMS       | 25                        | ✓                             | ✓      |                    |
| Finder (2020)                                                          | Abstract           | USA                                | 178               | RRMS       | 144                       | NR                            | NR     | NR                 |
|                                                                        |                    |                                    |                   | PPMS       | NR                        | NR                            | NR     |                    |
|                                                                        |                    |                                    |                   | SPMS       | NR                        | NR                            | NR     |                    |
| Luxenberg (2021)                                                       | Abstract           | USA                                | 59                | RRMS/PPMS  | 59                        | NR                            | NR     | NR                 |
| Magyari (2020)                                                         | Abstract           | Denmark                            | 851               | RRMS       | 735                       | ✓                             | ✓      | 0.9 years (median) |
|                                                                        |                    |                                    |                   | PPMS       | 55                        | ✓                             | ✓      |                    |
|                                                                        |                    |                                    |                   | SPMS       | 61                        | ✓                             | ✓      |                    |
| Pontieri (2022)                                                        | Full text          | Denmark                            | 1104              | RRMS       | 946                       | ✓                             | ✓      | NR                 |
|                                                                        |                    |                                    |                   | PPMS       | 61                        | ✓                             | ✓      |                    |

| Author (year of publication) | Full text/abstract | Country | Total sample size | Type of MS | Sample size by type of MS | Line of ocrelizumab treatment |        | Exposure time        |
|------------------------------|--------------------|---------|-------------------|------------|---------------------------|-------------------------------|--------|----------------------|
|                              |                    |         |                   |            |                           | First line                    | Switch |                      |
|                              |                    |         |                   | SPMS       | 97                        | ✓                             | ✓      |                      |
| Sempere (2020)               | Full text          | Spain   | 70                | RRMS       | 49                        | NR                            | NR     | NR                   |
|                              |                    |         |                   | PPMS       | 21                        | NR                            | NR     |                      |
| Smoot (2022)                 | Abstract           | USA     | 509               | RRMS       | 421                       | NR                            | NR     | 34.3 months (median) |
|                              |                    |         |                   | PPMS       | 34                        | NR                            | NR     |                      |
|                              |                    |         |                   | SPMS       | 54                        | NR                            | NR     |                      |
| Tsantes (2020)               | Abstract           | Italy   | 23                | RRMS       | 17                        | ×                             | ✓      | 15 months            |
|                              |                    |         |                   | PPMS       | 6                         | ×                             | ✓      |                      |
| Vollmer (2021)               | Abstract           | USA     | 245               | RRMS       | 200                       | NR                            | NR     | NR                   |
|                              |                    |         |                   | PPMS       | 8                         | NR                            | NR     |                      |
|                              |                    |         |                   | SPMS       | 37                        | NR                            | NR     |                      |
| Vollmer (2019)               | Abstract           | USA     | 357               | RRMS       | 267                       | NR                            | NR     | Up to 1 year         |
|                              |                    |         |                   | PPMS       | 31                        | NR                            | NR     |                      |
|                              |                    |         |                   | SPMS       | 59                        | NR                            | NR     |                      |

Abbreviations: MS, multiple sclerosis; NR, not reported; PPMS, primary progressive multiple sclerosis; RRMS, relapsing remitting multiple sclerosis; SPMS, secondary progressive multiple sclerosis

**Table S2. Overview of baseline characteristics**

| Author (year)                        | Country        | Intervention      | Sample size | Age (years)                  | Disease duration (years) | No previous therapy, n (%) | ARR                      | EDSS                      |
|--------------------------------------|----------------|-------------------|-------------|------------------------------|--------------------------|----------------------------|--------------------------|---------------------------|
| <b>Relapsing remitting MS (RRMS)</b> |                |                   |             |                              |                          |                            |                          |                           |
| Bewick (2020)                        | England        | Ocrelizumab       | 28          | 41.7 (mean)<br>25-28 (range) | NR                       | 12 (42.8%)                 | NR                       | 2 (median)<br>0-6 (range) |
| Bossart (2022)                       | Switzerland    | Fingolimod        | 139         | 46.1 (mean)<br>9.9 (SD)      | 9.7 (mean)<br>6.4 (SD)   | 7 (5%)                     | NR                       | NR                        |
|                                      |                | Dimethyl fumarate | 104         | 44 (mean)<br>11.5 (SD)       | 8.6 (mean)<br>8.0 (SD)   | 13 (12.5%)                 | NR                       | NR                        |
|                                      |                | Ocrelizumab       | 98          | 43.9 (mean)<br>11.9 (SD)     | 9.8 (mean)<br>6.7 (SD)   | 23 (24%)                   | NR                       | NR                        |
|                                      |                | Natalizumab       | 44          | 42.9 (mean)<br>11.9 (SD)     | 11.8 (mean)<br>7.0 (SD)  | 6 (14%)                    | NR                       | NR                        |
|                                      |                | Teriflunomide     | 31          | 50.9 (mean)<br>9.8 (SD)      | 9.7 (mean)<br>8.2 (SD)   | 4 (13%)                    | NR                       | NR                        |
| Cellerino (2021)                     | Italy          | Ocrelizumab       | 93          | 36.9 (mean)<br>10.2 (SD)     | 9.3 (mean)<br>9.2(SD)    | NR                         | 0.8 (mean)<br>0.7 (SD)   | 2 (median)<br>2-3.5 (IQR) |
| Coban (2021)                         | US             | Ocrelizumab       | 59          | 38 (mean)<br>11 (SD)         | 7.6 (mean)<br>9.8 (SD)   | 25 (42%)                   | 1.4 (mean)<br>0.9 (SD)   | 2.2 (mean)<br>1 (SD)      |
| Evertsson (2020)                     | Sweden and USA | Ocrelizumab       | 161         | 49.8 (mean)<br>11.9 (SD)     | 12.5 (mean)<br>8.32 (SD) | 7 (4.3%)                   | NR                       | NR                        |
|                                      |                | Rituximab         | 311         | 44 (mean)<br>11.7 (SD)       | 11.3 (mean)<br>8.9 (SD)  | 80 (25.7%)                 | NR                       | NR                        |
| Fernandez-Diaz (2021)                | Spain          | Ocrelizumab       | 144         | 39.5 (mean)                  | 7.3 (mean)<br>6.6 (SD)   | 36 (25%)                   | 1.12 (mean)<br>0.77 (SD) | 2.8 (mean)<br>1.6 (SD)    |
| Frahm (2022)                         | Germany        | Ocrelizumab       | 178         | 41.8 (mean)<br>10.3 (SD)     | NR                       | 0                          | 0.32 (NR)                | 3.5 (median)              |



| Author (year)                        | Country | Intervention | Sample size | Age (years)                | Disease duration (years) | No previous therapy, n (%) | ARR                           | EDSS                          |
|--------------------------------------|---------|--------------|-------------|----------------------------|--------------------------|----------------------------|-------------------------------|-------------------------------|
| Garcia-Canibano (2021)               | Qatar   | Ocrelizumab  | 57          | 34.9 (mean)<br>10.4 (SD)   | 7.0 (mean)<br>6.6 (SD)   | 24 (38%)                   | NR                            | 2.1 (mean)<br>2.4 (SD)        |
| Ozakbas (2021)                       | NR      | Ocrelizumab  | 87          | NR                         | 17.7 (mean)              | NR                         | NR                            | NR                            |
| Pontieri (2022)                      | Denmark | Ocrelizumab  | 946         | 41.4 (mean)<br>10.2 (SD)   | 10.8 (mean)<br>8.2 (SD)  | 118 (12.5%)                | 0.6 (mean)<br>0.8 (SD)        | 2.9 (mean)<br>1.7 (SD)        |
| Sempere (2020)                       | Spain   | Ocrelizumab  | 49          | 39.2 (mean)<br>10.9 (SD)   | 7.7 (mean)<br>6.7 (SD)   | 10 (20%)                   | 1.3 (mean)<br>0.65 (SD)       | 2.5 (median)<br>2-3 (IQR)     |
| Smoot (2019)                         | USA     | Ocrelizumab  | 21          | 43.7 (mean)<br>10.6 (SD)   | NR                       | 0                          | NR                            | 3.4 (mean)<br>1.5 (SD)        |
| Weber (2022)                         | Germany | Ocrelizumab  | 1702        | 41.6 (mean)<br>11.2 (SD)   | 9.0 (mean)<br>7.8 (SD)   | 294 (17.3%)                | NR                            | 3.18 (mean)<br>1.87 (SD)      |
| Zanghi (2021)                        | Italy   | Ocrelizumab  | 64          | NR                         | NR                       | 0                          | NR                            | 3 (median)<br>2-4.5 (IQR)     |
|                                      |         | Rituximab    | 36          | NR                         | NR                       | 0                          | NR                            | 4 (median)<br>2-4.5 (IQR)     |
|                                      |         | Cladribine   | 20          | NR                         | NR                       | 0                          | NR                            | 2 (median)<br>1-3 (IQR)       |
| Zivadinov (2022)                     | USA     | Ocrelizumab  | 27          | 42.3 (mean)<br>10.6 (SD)   | 10.1 (mean)<br>5.6 (SD)  | 0                          | 1.0 (median)<br>0.0-2.0 (IQR) | 2.0 (median)<br>1.5-3.5 (IQR) |
| <b>Primary progressive MS (PPMS)</b> |         |              |             |                            |                          |                            |                               |                               |
| Braune (2021)                        | Germany | Any          | 460         | 62.29 (mean)<br>11.35 (SD) | 18.7 (mean)<br>11.0 (SD) | NR                         | NR                            | NR                            |
|                                      |         | Ocrelizumab  | 82          | 51.5 (mean)<br>10.03 (SD)  | 8.7 (mean)<br>7.8 (SD)   | NR                         | NR                            | NR                            |
| Cellerino (2021)                     | Italy   | Ocrelizumab  | 43          | 49.2 (mean)<br>8.6 (SD)    | 8.4 (mean)<br>6.5 (SD)   | NR                         | NR                            | 5.5 (median)<br>3.5-6.5 (IQR) |

| Author (year)                                                                            | Country                                     | Intervention | Sample size | Age (years)                         | Disease duration (years)    | No previous therapy, n (%) | ARR                    | EDSS                        |
|------------------------------------------------------------------------------------------|---------------------------------------------|--------------|-------------|-------------------------------------|-----------------------------|----------------------------|------------------------|-----------------------------|
| Coban (2021)                                                                             | US                                          | Ocrelizumab  | 14          | 46 (mean)<br>10 (SD)                | 3.5 (mean)<br>3.7 (SD)      | 11 (79%)                   | NR                     | 4.6 (mean)<br>1.5 (SD)      |
| Fernandez-Diaz (2021)                                                                    | Spain                                       | Ocrelizumab  | 59          | 48.4 (mean)<br>9.3 (SD)             | 4.2 (mean)<br>4.9 (SD)      | 46 (78%)                   | NR                     | 4.75 (mean)<br>1.43 (SD)    |
| Lopez Ruiz (2020)                                                                        | Spain                                       | Ocrelizumab  | 18          | 47 (NR)<br>37-57 (NR)               | 5.4 (mean)<br>0.5-12.3 (NR) | 12 (67%)                   | NR                     | 5.7 (mean)                  |
| Ozakbas (2021)                                                                           | NR                                          | Ocrelizumab  | 42          | NR                                  | 17.7 (mean)                 | NR                         | NR                     | NR                          |
| Pontieri (2022)                                                                          | Denmark                                     | Ocrelizumab  | 61          | 44.5 (mean)<br>6.9 (SD)             | 6.6 (mean)<br>3.7 (SD)      | 48 (79%)                   | 0.1 (mean)<br>0.2 (SD) | 4 (mean)<br>1.6 (SD)        |
| Sempere (2020)                                                                           | Spain                                       | Ocrelizumab  | 21          | 47.1 (mean)<br>10.5 (SD)            | 2.8 (mean)<br>4.1 (SD)      | 19 (90%)                   | NR                     | 3 (median)<br>3-4.8 (IQR)   |
| Weber (2022)                                                                             | Germany                                     | Ocrelizumab  | 398         | 51.0 (mean)<br>9.9 (SD)             | 5.6 (mean)<br>6.8 (SD)      | 268 (67.3%)                | NR                     | 4.41 (mean)<br>1.59 (SD)    |
| <b>Relapsing remitting MS and primary progressive MS combined population<sup>a</sup></b> |                                             |              |             |                                     |                             |                            |                        |                             |
| Baghestani (2020)                                                                        | UAE                                         | Ocrelizumab  | 26          | 40 (mean)                           | 4.8 (mean)<br>0-12 (range)  | 6 (23%)                    | NR                     | NR                          |
| Braune (2020)                                                                            | Germany                                     | Ocrelizumab  | 439         | NR                                  | NR                          | NR                         | NR                     | NR                          |
| Butzkueven (2021)                                                                        | Australia,<br>Turkey,<br>Kuwait,<br>Belgium | Ocrelizumab  | 800         | 42.7 (median)<br>35.2-50.4<br>(IQR) | 12.4 (mean)<br>8.3 (SD)     | 104 (13%)                  | NR                     | NR                          |
| Butzkueven (2019)                                                                        | Europe &<br>Australia                       | Ocrelizumab  | 1216        | NR                                  | NR                          | 204 (16.8%)                | NR                     | NR                          |
| Cellerino (2021)                                                                         | Italy                                       | Ocrelizumab  | 153         | 41.9 (mean)<br>11.4 (SD)            | 16.1 (mean)<br>9.9 (SD)     | NR                         | 0.5 (mean)<br>0.7 (SD) | 3.5 (median)<br>2-5.5 (IQR) |
| Coban (2021)                                                                             | US                                          | Ocrelizumab  | 82          | 40 (mean)                           | 8.0 (mean)                  | 39 (47%)                   | 1.4 (mean)<br>0.9 (SD) | 3.1 (mean)<br>1.8 (SD)      |
| Ellwardt (2020)                                                                          | Germany                                     | Ocrelizumab  | 210         | 42.1 (mean)                         | 7.2 (mean)                  | 50 (24%)                   | NR                     | 3.9 (mean)                  |

| Author (year)         | Country                  | Intervention      | Sample size | Age (years)              | Disease duration (years) | No previous therapy, n (%) | ARR                      | EDSS                       |
|-----------------------|--------------------------|-------------------|-------------|--------------------------|--------------------------|----------------------------|--------------------------|----------------------------|
| Fernandez-Diaz (2021) | Spain                    | Ocrelizumab       | 228         | 42.7 (mean)<br>11.2 (SD) | 6.98 (mean)<br>6.66 (SD) | 83 (36.4%)                 | 1.11 (mean)<br>0.81 (SD) | 3.58 (mean)<br>1.83 (SD)   |
| Finder (2020)         | USA                      | Ocrelizumab       | 55          | NR                       | NR                       | 69 (38.8%)                 | NR                       | NR                         |
|                       |                          | Fingolimod        | NR          | NR                       | NR                       | NR                         | NR                       | NR                         |
|                       |                          | Dimethyl fumarate | NR          | NR                       | NR                       | NR                         | NR                       | NR                         |
|                       |                          | Teriflunomide     | NR          | NR                       | NR                       | NR                         | NR                       | NR                         |
| Luxenberg (2021)      | USA                      | Ocrelizumab       | 59          | 59-84 (range)            | NR                       | NR                         | NR                       | NR                         |
| Magyari (2020)        | Denmark                  | Ocrelizumab       | 851         | NR                       | NR                       | 131 (15.4%)                | NR                       | NR                         |
| Rojas (2021)          | Argentina, Chile, Mexico | Ocrelizumab       | 81          | 41.3 (mean)<br>12 (SD)   | 8.4 (mean)<br>6.3 (SD)   | 29 (24%)                   | 1.3 (mean)<br>0.6 (SD)   | 3.1 (mean)<br>1.8 (SD)     |
| Sempere (2020)        | Spain                    | Ocrelizumab       | 70          | 41.6 (mean)              | 6.53 (mean)              | 29 (41%)                   | NR                       | NR                         |
| Smoot (2022)          | USA                      | Ocrelizumab       | 509         | 52.1 (mean)<br>12.6 (SD) | NR                       | NR                         | 0.32 (mean)              | NR                         |
| Tsantes (2020)        | Italy                    | Ocrelizumab       | 23          | 40.4 (mean)              | 11 (mean)<br>5.67 (SD)   | 0 (0%)                     | NR                       | 3.1 (mean)<br>1.5-6.5 (NR) |
| Vollmer (2021)        | USA                      | Ocrelizumab       | 245         | 44.4 (mean)              | 9.6 (mean)               | NR                         | NR                       | NR                         |
| Vollmer (2019)        | USA                      | Ocrelizumab       | 357         | 45.1 (mean)              | 9.8 (mean)               | NR                         | NR                       | NR                         |

Abbreviations: ARR, annualized relapse rate; EDSS, expanded disability status scale; IQR, interquartile range; MS, multiple sclerosis; NA, not applicable; NR, not reported; SD, standard deviation

\*Some studies include patients with secondary progressive MS, but ≥80% of the total study population were RRMS and/or PPMS

**Table S3. Ocrelizumab discontinuation data**

| Author (year)                        | Country     | Intervention      | Line of intervention, n (%) | Switched from | Treatment period | Sample size | Patients who discontinued, n (%) | Reasons for discontinuation, n (%)                                                                                                                                           | Time to discontinuation |
|--------------------------------------|-------------|-------------------|-----------------------------|---------------|------------------|-------------|----------------------------------|------------------------------------------------------------------------------------------------------------------------------------------------------------------------------|-------------------------|
| <b>Relapsing remitting MS (RRMS)</b> |             |                   |                             |               |                  |             |                                  |                                                                                                                                                                              |                         |
| Bewick (2020)                        | England     | Ocrelizumab       | First (42.8%) and switch    | NR            | NR               | 28          | 1 (3.5%)                         | Adverse events, 1 (3.5%)                                                                                                                                                     | NR                      |
| Bossart (2022)                       | Switzerland | Fingolimod        | NR                          | NR            | 6 months         | 139         | 1 (0.7%)                         | NR                                                                                                                                                                           | NR                      |
|                                      |             | Dimethyl fumarate | NR                          | NR            | 6 months         | 104         | 6 (5.8%)                         | NR                                                                                                                                                                           | NR                      |
|                                      |             | Ocrelizumab       | NR                          | NR            | 6 months         | 98          | 10 (10.2%)                       | NR                                                                                                                                                                           | NR                      |
|                                      |             | Natalizumab       | NR                          | NR            | 6 months         | 44          | 3 (6.8%)                         | NR                                                                                                                                                                           | NR                      |
|                                      |             | Teriflunomide     | NR                          | NR            | 6 months         | 31          | 1 (3.2%)                         | NR                                                                                                                                                                           | NR                      |
| Evertsson (2020)                     | Sweden, USA | Ocrelizumab       | First, 7 (4.34%) and switch | NR            | NR               | 161         | 25 (15.5%)                       | Adverse events, 15 (9.3%)<br>Lack of effect, 5 (3.1%)<br>Lost to follow up, 3 (1.9%)<br>Other reasons, 2 (1.2%)                                                              | NR                      |
|                                      |             | Rituximab         | First, 80 (25.7) and switch | NR            | NR               | 311         | NR (10%)                         | Adverse events, 8 (2.6%)<br>Lack of effect, 5 (1.6%)<br>Lost to follow up, 2 (0.6%)<br>Other reasons, 5 (1.6%)<br>Stable disease, 10 (3.2%)<br>Pregnancy confirmed, 1 (0.3%) | NR                      |

| Author (year)          | Country                  | Intervention | Line of intervention, n (%)                    | Switched from | Treatment period   | Sample size | Patients who discontinued, n (%) | Reasons for discontinuation, n (%)                                                                                                                                   | Time to discontinuation |
|------------------------|--------------------------|--------------|------------------------------------------------|---------------|--------------------|-------------|----------------------------------|----------------------------------------------------------------------------------------------------------------------------------------------------------------------|-------------------------|
| Frahm (2022)           | Germany                  | Ocrelizumab  | Switch                                         | Fingolimod    | NR                 | 178         | 3 (1.7%)                         | Switch, 2 (1.1%)<br>Stop, 1 (0.6%)                                                                                                                                   | NR                      |
| Garcia-Canibano (2021) | Qatar                    | Ocrelizumab  | First line, NR (38%) and switch, NR (62%)      | Various       | 19 months (median) | 57          | 1 (1.8%)                         | Unplanned pregnancy, 1 (1.8%)                                                                                                                                        | NR                      |
| Ozakbas (2021)         | NR                       | Ocrelizumab  | NR                                             | NR            | 6 months           | 87          | 0 (0%)                           | NA                                                                                                                                                                   | NA                      |
| Pontieri (2022)        | Denmark                  | Ocrelizumab  | First line, 118 (12.5%)<br>Switch, 828 (87.5%) | Various       | 1.2 years (mean)   | 946         | 51 (4.6%)                        | Adverse events, 23 (2.4%)<br>Pregnancy plans, 10 (1.1%)<br>Progression, 6 (0.6%)<br>Lack of compliance, 6 (0.6%)<br>Death, 3 (0.3%)<br>Unspecified reasons, 3 (0.3%) | 0.6 years (median)      |
| Rojas (2021)           | Argentina, Chile, Mexico | Ocrelizumab  | First-line, 7 and switch, 45                   | Various       | >12 months         | 52          | 1 (1.9%)                         | Other, 1 (1.9%)                                                                                                                                                      | NR                      |
| Smoot (2019)           | USA                      | Ocrelizumab  | Switch                                         | Natalizumab   | 12 months          | 21          | 0 (0%)                           | NA                                                                                                                                                                   | NA                      |
| Weber (2022)           | Germany                  | Ocrelizumab  | First-line, 294 (17.3%)                        | Various       | 1.03 years (mean)  | 1702        | 80 (4.7%)                        | Adverse events, 13 (0.8%)<br>Patient wish, 37 (2.2%)<br>Insufficient efficacy, 12 (0.7%)                                                                             | NR                      |

| Author (year)                        | Country                  | Intervention | Line of intervention, n (%)                  | Switched from | Treatment period   | Sample size | Patients who discontinued, n (%) | Reasons for discontinuation, n (%)                                               | Time to discontinuation |
|--------------------------------------|--------------------------|--------------|----------------------------------------------|---------------|--------------------|-------------|----------------------------------|----------------------------------------------------------------------------------|-------------------------|
|                                      |                          |              |                                              |               |                    |             |                                  | Pregnancy wish, 6 (0.4%)<br>Pregnancy, 4 (0.2%)<br>Other, 8 (0.5%)               |                         |
| Zanghi (2021)                        | Italy                    | Ocrelizumab  | Switch                                       | Natalizumab   | 18 months (median) | 64          | 0 (0%)*                          | NA                                                                               | NA                      |
|                                      |                          | Rituximab    | Switch                                       | Natalizumab   | 17 months (median) | 36          | 0 (0%)*                          | NA                                                                               | NA                      |
|                                      |                          | Cladribine   | Switch                                       | Natalizumab   | 16 months (median) | 20          | 0 (0%)*                          | NA                                                                               | NA                      |
| Zivadinov (2022)                     | USA                      | Ocrelizumab  | Switch                                       | Various       | 24 months          | 27          | 4 (14.8%)                        | Adverse events, 1 (3.7%)<br>Patient decisions in relation to COVID-19, 3 (11.1%) | NR                      |
| <b>Primary progressive MS (PPMS)</b> |                          |              |                                              |               |                    |             |                                  |                                                                                  |                         |
| Braune (2021)                        | Germany                  | Ocrelizumab  | NR                                           | NR            | 12 months          | 77          | 1 (1.3%)                         | NR                                                                               | NR                      |
| Lopez-Ruiz (2020)                    | Spain                    | Ocrelizumab  | First-line, 12 (66.7%) and Switch, 6 (33.3%) | Various       | 13.8 months (mean) | 18          | 0 (0%)                           | NA                                                                               | NA                      |
| Ozakbas (2021)                       | NR                       | Ocrelizumab  | NR                                           | NR            | 6 months           | 42          | 0 (0%)                           | NA                                                                               | NA                      |
| Rojas (2021)                         | Argentina, Chile, Mexico | Ocrelizumab  | First-line, 12 (NR) and switch               | Various       | >12 months         | 29          | 2 (6.7%)                         | Poor tolerability, 1 (3.4%)<br>Disease activity, 1 (3.4%)                        | NR                      |
| Weber (2022)                         | Germany                  | Ocrelizumab  | First-line, 268 (67.3%)                      | Various       | 1.06 years (mean)  | 398         | 19 (4.8%)                        | Adverse events, 4 (1.0%)<br>Patient wish, 9 (2.3%)                               | NR                      |

| Author (year)                                                                            | Country                            | Intervention | Line of intervention, n (%)                    | Switched from | Treatment period  | Sample size | Patients who discontinued, n (%)    | Reasons for discontinuation, n (%)                        | Time to discontinuation |
|------------------------------------------------------------------------------------------|------------------------------------|--------------|------------------------------------------------|---------------|-------------------|-------------|-------------------------------------|-----------------------------------------------------------|-------------------------|
|                                                                                          |                                    |              |                                                |               |                   |             |                                     | Insufficient efficacy, 3 (0.8%)<br>Other, 3 (0.8%)        |                         |
| <b>Relapsing remitting MS and primary progressive MS combined population<sup>†</sup></b> |                                    |              |                                                |               |                   |             |                                     |                                                           |                         |
| Baghestani (2020)                                                                        | UAE                                | Ocrelizumab  | First (23%) and switch                         | Various       | 9.6 months (mean) | 27          | 2 (7.4%)                            | Lost to follow up, 2 (7.7%)                               |                         |
| Butzkueven (2021)                                                                        | Australia, Turkey, Kuwait, Belgium | Ocrelizumab  | First, NR (13%) and switch                     | Various       | NR                | 800         | 26 (3.3%)                           | NR                                                        | 1.8 years (median)      |
| Butzkueven (2019)                                                                        | Europe and Australia               | Ocrelizumab  | First and switch, NR                           | Various       | 12 months         | 1216        | 1.6%                                | NR                                                        | NR                      |
|                                                                                          |                                    |              |                                                |               | 24 months         | 1216        | 7.5%                                | NR                                                        | NR                      |
| Braune (2020)                                                                            | Germany                            | Ocrelizumab  | First and switch, NR                           | Various       | ≥3 months         | 439         | 0 (0%)                              | NA                                                        | NA                      |
| Cellerino (2021)                                                                         | Italy                              | Ocrelizumab  | NR                                             | NR            | 24 months         | 153         | 6 (3.9%)                            | Adverse effects, 6 (3.9)                                  | NR                      |
| Coban (2021)                                                                             | USA                                | Ocrelizumab  | First line, 39 (47%)<br>Switch, 43 (53%)       | Various       | NR                | 82          | 4 (4.8%)                            | NR                                                        | NR                      |
| Ellwardt (2020)                                                                          | Germany                            | Ocrelizumab  | First, NR (24%) and switch, NR (76%)           | Various       | NR                | 210         | 1 (0.5%) (Temporarily discontinued) | Adverse events, 1 (0.5%)                                  | 5 months                |
| Fernandez-Diaz (2021)                                                                    | Spain                              | Ocrelizumab  | First-line, 83 (36.4%) and switch, 145 (63.6%) | Various       | 12 months         | 228         | 5 (2.2%)                            | Death<br>Pregnancy<br>Patient's choice<br>Ineffectiveness | NR                      |
| Finder (2020)                                                                            | USA                                | Ocrelizumab  | First-line, 69 (38.8%)                         | NR            | NR                | 178         | 0 (0%)                              | NR                                                        | NR                      |
|                                                                                          |                                    | Fingolimod   | NR                                             | NR            | NR                | NR          | 8 (NR)                              | NR                                                        | NR                      |

| Author (year)    | Country | Intervention      | Line of intervention, n (%)                        | Switched from | Treatment period | Sample size | Patients who discontinued, n (%) | Reasons for discontinuation, n (%)                                                                                                                                                       | Time to discontinuation |
|------------------|---------|-------------------|----------------------------------------------------|---------------|------------------|-------------|----------------------------------|------------------------------------------------------------------------------------------------------------------------------------------------------------------------------------------|-------------------------|
|                  |         | Dimethyl fumarate | NR                                                 | NR            | NR               | NR          | 17 (NR)                          | NR                                                                                                                                                                                       | NR                      |
|                  |         | Teriflunomide     | NR                                                 | NR            | NR               | NR          | 10 (NR)                          | NR                                                                                                                                                                                       | NR                      |
| Luxenberg (2021) | USA     | Ocrelizumab       | NR                                                 | NR            | NR               | 59          | 14 (23.7%)                       | Adverse events, 5 (8.5%)<br>MS progression, 5 (8.5%)<br>Receiving autologous stem cell transplant, 1 (1.7%)<br>Unfavorable risk/benefit ratio, 2 (3.4%)<br>Worsening psoriasis, 1 (1.7%) | NR                      |
| Magyari (2020)   | Denmark | Ocrelizumab       | First line, 131 (41 of which were PPMS) and switch | NR            | NR               | 851         | 18 (2.1%)                        | Adverse effects, 9 (1.1%)<br>Disease breakthrough, 2 (0.2%)                                                                                                                              | NR                      |
| Pontieri (2022)  | Denmark | Ocrelizumab       | First line, 166<br>Switch, 841                     | Various       | NR               | 1104        | 51 (4.6%)                        | Adverse effects, 23<br>Pregnancy plans, 10<br>Progression, 6<br>Lack of compliance, 6<br>Death, 3<br>Unspecified reasons, 3                                                              | 0.6 years (median)      |



| Author (year)  | Country | Intervention | Line of intervention, n (%)              | Switched from | Treatment period     | Sample size | Patients who discontinued, n (%) | Reasons for discontinuation, n (%)                                                                                                                                                           | Time to discontinuation |
|----------------|---------|--------------|------------------------------------------|---------------|----------------------|-------------|----------------------------------|----------------------------------------------------------------------------------------------------------------------------------------------------------------------------------------------|-------------------------|
| Sempere (2020) | Spain   | Ocrelizumab  | First line, 29 (41%)<br>Switch, 42 (59%) | NR            | 13.6 months (mean)   | 70          | 2 (2.9%)                         | Pregnancy, 1<br>Lack of efficacy, 1                                                                                                                                                          | NR                      |
| Smoot (2022)   | USA     | Ocrelizumab  | NR                                       | NR            | 34.3 months (median) | 509         | 129 (25.3%)                      | Adverse events, 63 (12.4%)                                                                                                                                                                   | 20.5 months (median)    |
| Tsantes (2020) | Italy   | Ocrelizumab  | Switch                                   | Natalizumab   | 15 months            | 23          | 0 (0%)                           | NA                                                                                                                                                                                           | NA                      |
| Vollmer (2021) | USA     | Ocrelizumab  | NR                                       | NR            | Up to 24 months      | 245         | 51 (20.8%)                       | Adverse events, 2 (0.8%)<br>Insurance issues, 17 (6.9%)<br>Lost to follow up, 22 (9.0%)<br>Other reasons (e.g., family planning, concern for cancer, preference for no treatment), 10 (4.1%) | NR                      |
| Vollmer (2019) | USA     | Ocrelizumab  | NR                                       | NR            | Up to 12 months      | 357         | 19 (5.3%)                        | NR                                                                                                                                                                                           | NR                      |

Abbreviations: MS, multiple sclerosis; NA, not applicable; NR, not reported

\*number of patients who discontinued for safety concerns

†Some studies include patients with secondary progressive MS, but ≥80% of the total study population were RRMS and/or PPMS
